# Supplementary material for: One-step in situ synthesis of strontium ferrites and strontium ferrites/graphene composites as microwave absorbing materials
Source: Royal Society of Chemistry journal article supplement (doi:10.1039/c7ra05700h), 2017-01-01
Supplement: c7ra05700h1.pdf [file c7ra05700h1.pdf]

## One-step in situ synthesis of strontium ferrites and strontium ferrites/graphene composites as microwave absorbing materials

Wei Chen, Qingyun Liu, Xixi Zhu, Min Fu\*

College of Chemical and Environmental Engineering, Shandong University of Science and Technology, Qingdao 266590, P. R. China.

\* Corresponding author. Tel: +86-532-86057757; Fax: +86-532-80681197

E-mail address: fumin@sdust.edu.cn, fuminis@163.com

### *Rietveld refinement*

The crystalline structure of  $\text{SrFe}_{12}\text{O}_{19}$  is hexagonal (PDF Card No. 33-1340) [1]. And the Rietveld refinement of XRD patterns of  $\text{SrFe}_{12}\text{O}_{19}/\text{G}$  composites was conducted. According to the existing structural model, the  $\text{SrFe}_{12}\text{O}_{19}/\text{G}$  composites showed that the calculated profile basically matched the experimental data. The refinement result of unit cell parameters well matched the experimental data.

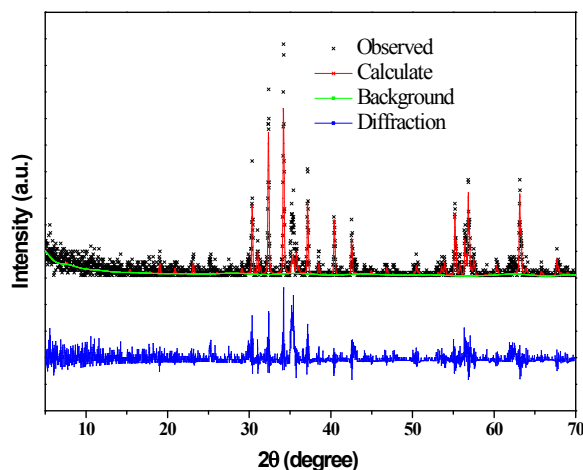

Fig. 1 Rietveld refinement of XRD patterns of  $\text{SrFe}_{12}\text{O}_{19}/\text{G}$  composite.

### References:

- [1] C.S. Lin, C.C. Hwang, T.H. Huang, G.P. Wang, C.H. Peng, Mater. Sci. Eng. B. 139(2007)24.
